# Supplementary material
Source: PubMed Central journal article supplement (PMC3157202)
Supplement: mmc8.pdf [file mmc8.pdf]

| RefSeq       | #seeds | Target                                                                                                           |
|--------------|--------|------------------------------------------------------------------------------------------------------------------|
| NM_001001508 | 6      | Rattus norvegicus plasticity related gene 1 (Lppr4), mRNA                                                        |
| NM_001108615 | 6      | Rattus norvegicus myelin transcription factor 1 (Myt1), mRNA                                                     |
| NM_012775    | 6      | Rattus norvegicus transforming growth factor, beta receptor 1 (Tgfbr1), mRNA                                     |
| NM_022599    | 6      | Rattus norvegicus synaptojanin 2 binding protein (Synj2bp), mRNA                                                 |
| NM_001007688 | 5      | Rattus norvegicus LEA_4 domain containing protein RGD1359600 (RGD1359600), mRNA                                  |
| NM_001008362 | 5      | Rattus norvegicus zinc finger protein 655 (Znf655), mRNA                                                         |
| NM_001105668 | 5      | Rattus norvegicus MyoD family inhibitor domain containing (Mdfic), mRNA                                          |
| NM_001105881 | 5      | Rattus norvegicus N-acetyltransferase 13 (Nat13), mRNA                                                           |
| NM_001107213 | 5      | Rattus norvegicus ubiquitin-like modifier activating enzyme 6 (Uba6), mRNA                                       |
| NM_001107641 | 5      | Rattus norvegicus single-minded homolog 1 (Drosophila) (Sim1), mRNA                                              |
| NM_001108666 | 5      | Rattus norvegicus structural maintenance of chromosomes 2 (Smc2), mRNA                                           |
| NM_001109317 | 5      | Rattus norvegicus similar to transmembrane 4 superfamily member 10 (RGD1564799), mRNA                            |
| NM_012555    | 5      | Rattus norvegicus v-ets erythroblastosis virus E26 oncogene homolog 1 (avian) (Ets1), mRNA                       |
| NM_031841    | 5      | Rattus norvegicus stearyl-CoA desaturase (delta-9-desaturase) (Scd), mRNA                                        |
| NM_138879    | 5      | Rattus norvegicus selectin, endothelial cell (Sele), mRNA                                                        |
| NM_172066    | 5      | Rattus norvegicus solute carrier family 30 (zinc transporter), member 4 (Slc30a4), mRNA                          |
| NM_001009349 | 4      | Rattus norvegicus 5,10-methenyltetrahydrofolate synthetase (5-formyltetrahydrofolate cyclo-ligase) (Mthfs), mRNA |
| NM_001013434 | 4      | Rattus norvegicus related RAS viral (r-ras) oncogene homolog 2 (Rras2), mRNA                                     |
| NM_001105880 | 4      | Rattus norvegicus zinc finger and BTB domain containing 20 (Zbtb20), mRNA                                        |
| NM_001106415 | 4      | Rattus norvegicus Nipped-B homolog (Drosophila) (NIPBL), mRNA                                                    |

**Supplementary Table 1:- mRNA targets of miR200 b/c.** Potential targets were obtained through searching 3'UTR sequences of rat mRNAs for the seeds of miRNAs. Rat mRNAs were downloaded from UCSC Genome Browser (<http://genome.ucsc.edu/>). For each 3'UTR, a number of seeds, its flanking nucleotides and position were recorded. Each list of potential targets was screened using specific criteria including high number of seeds, small distance between seeds and physiological function of the targets. Targets presented represent those which have highest number of seeds present.
