# Supplementary material
Source: PubMed Central journal article supplement (PMC3157202)

**A**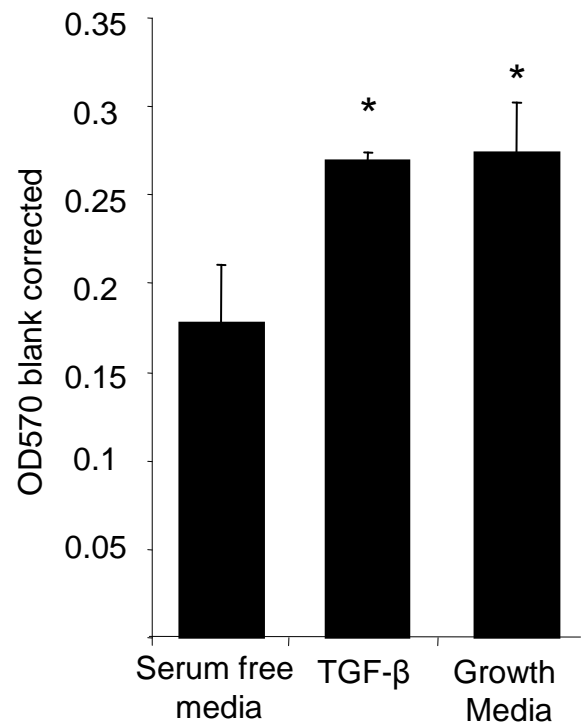**B**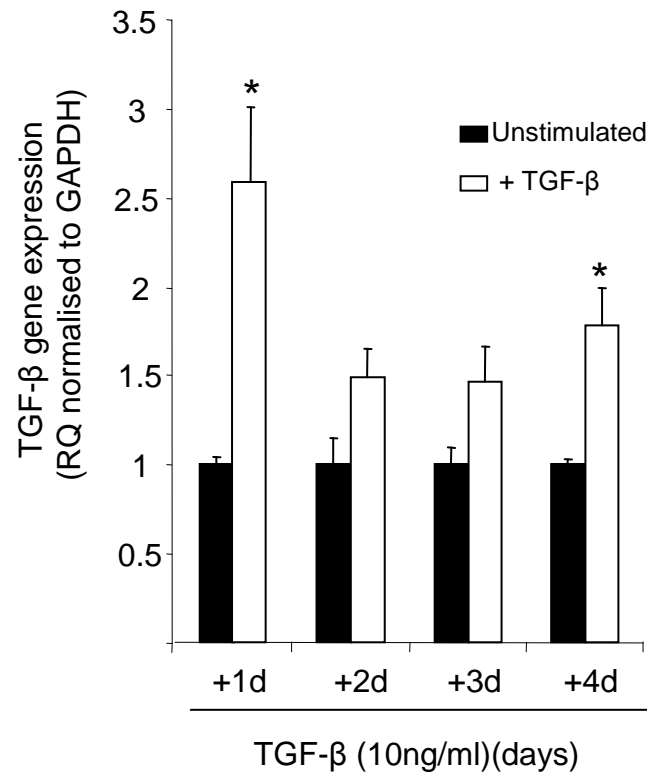**C**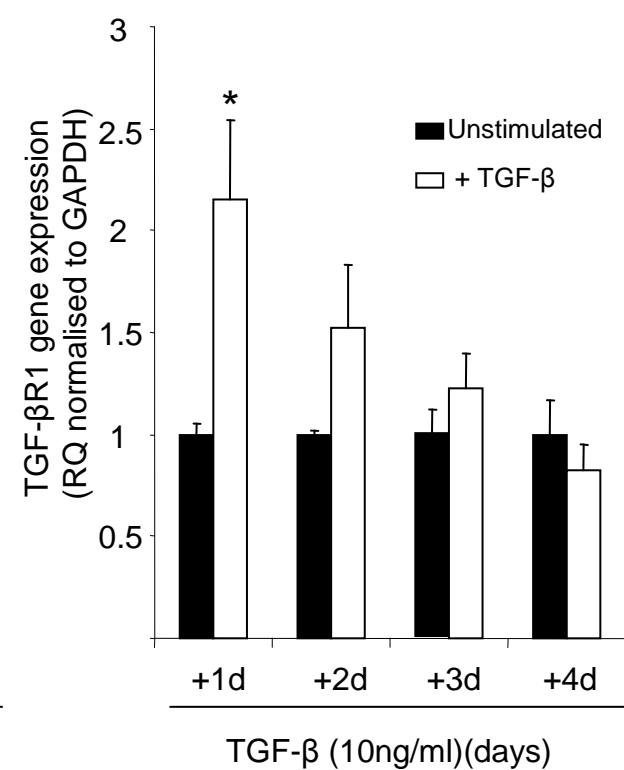

Supplement: mmc1.pdf [file mmc1.pdf]

**A**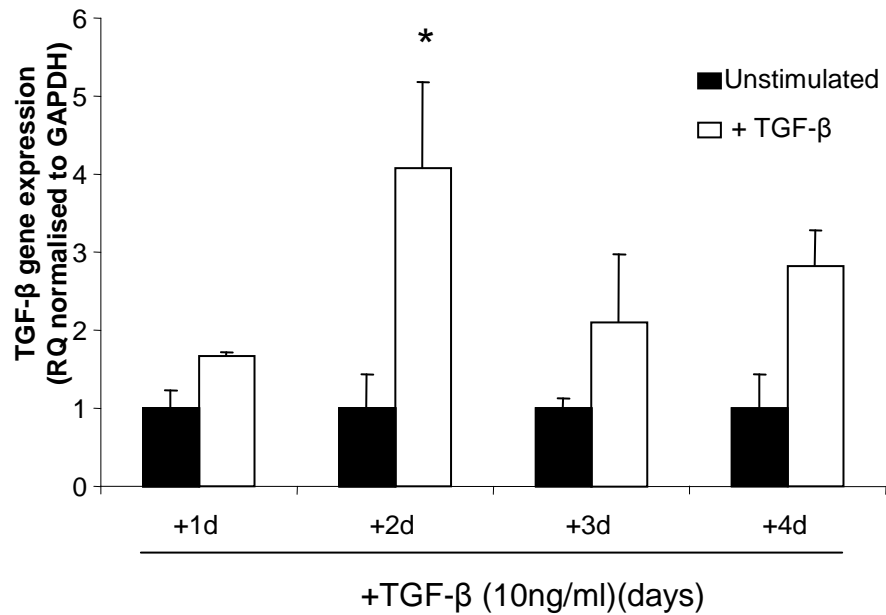**B**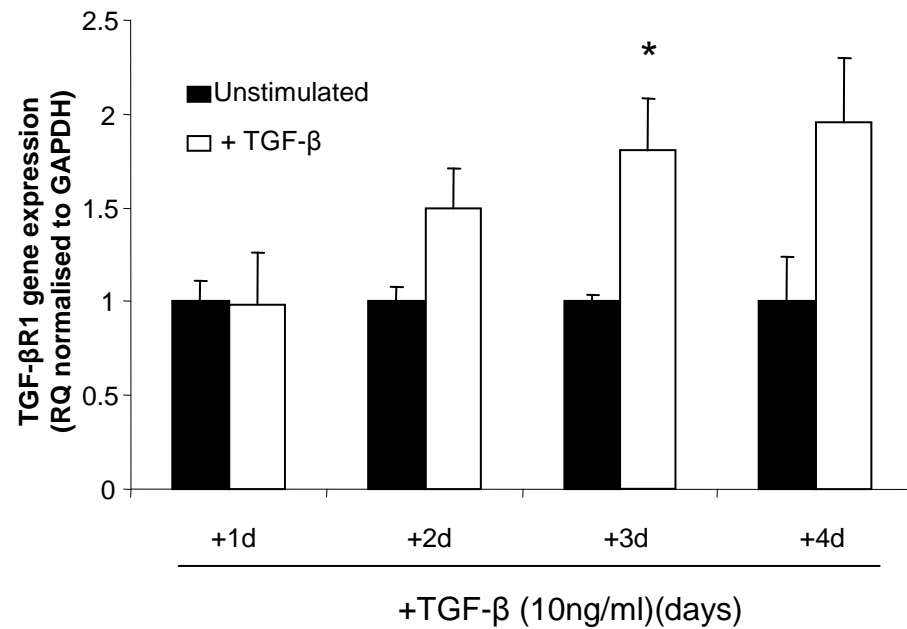

Supplement: mmc2.pdf [file mmc2.pdf]

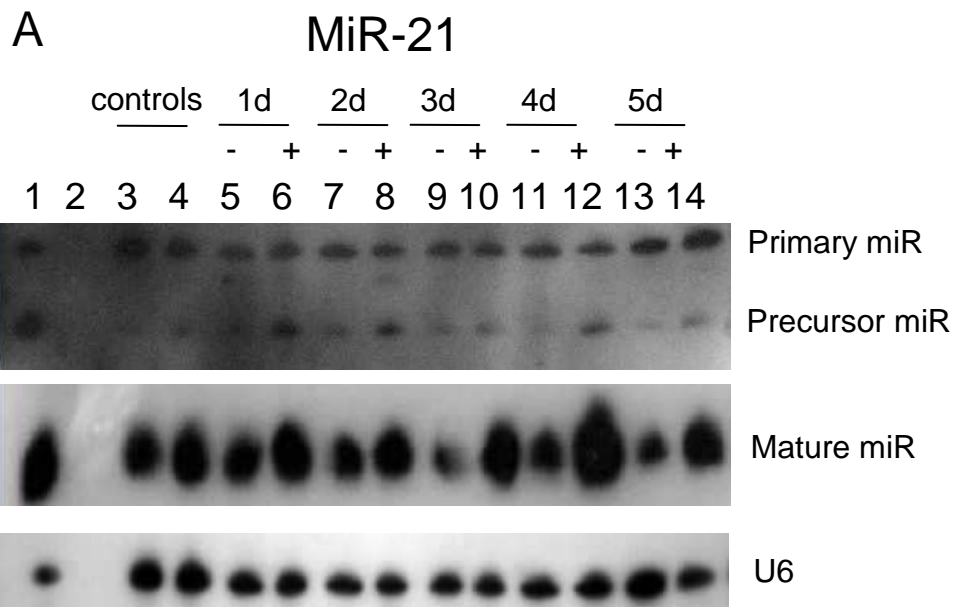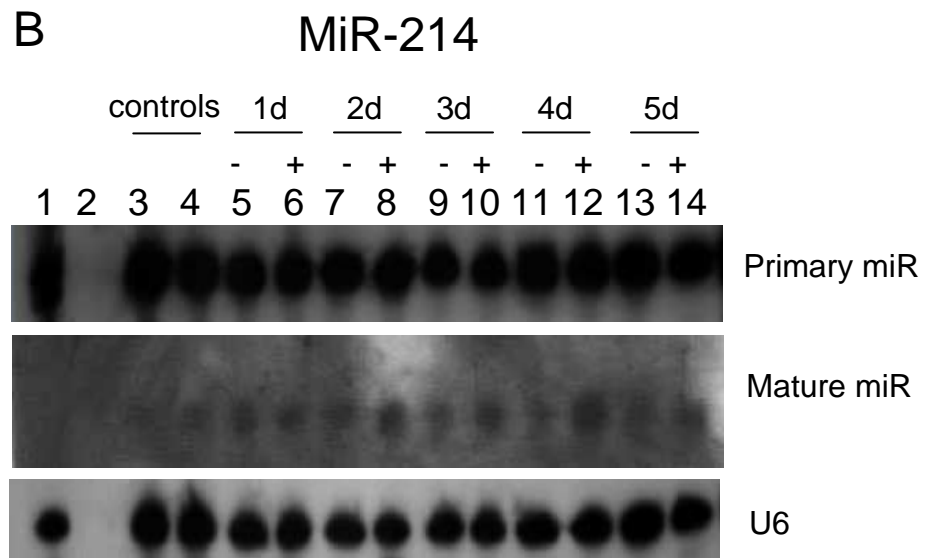

Supplement: mmc3.pdf [file mmc3.pdf]

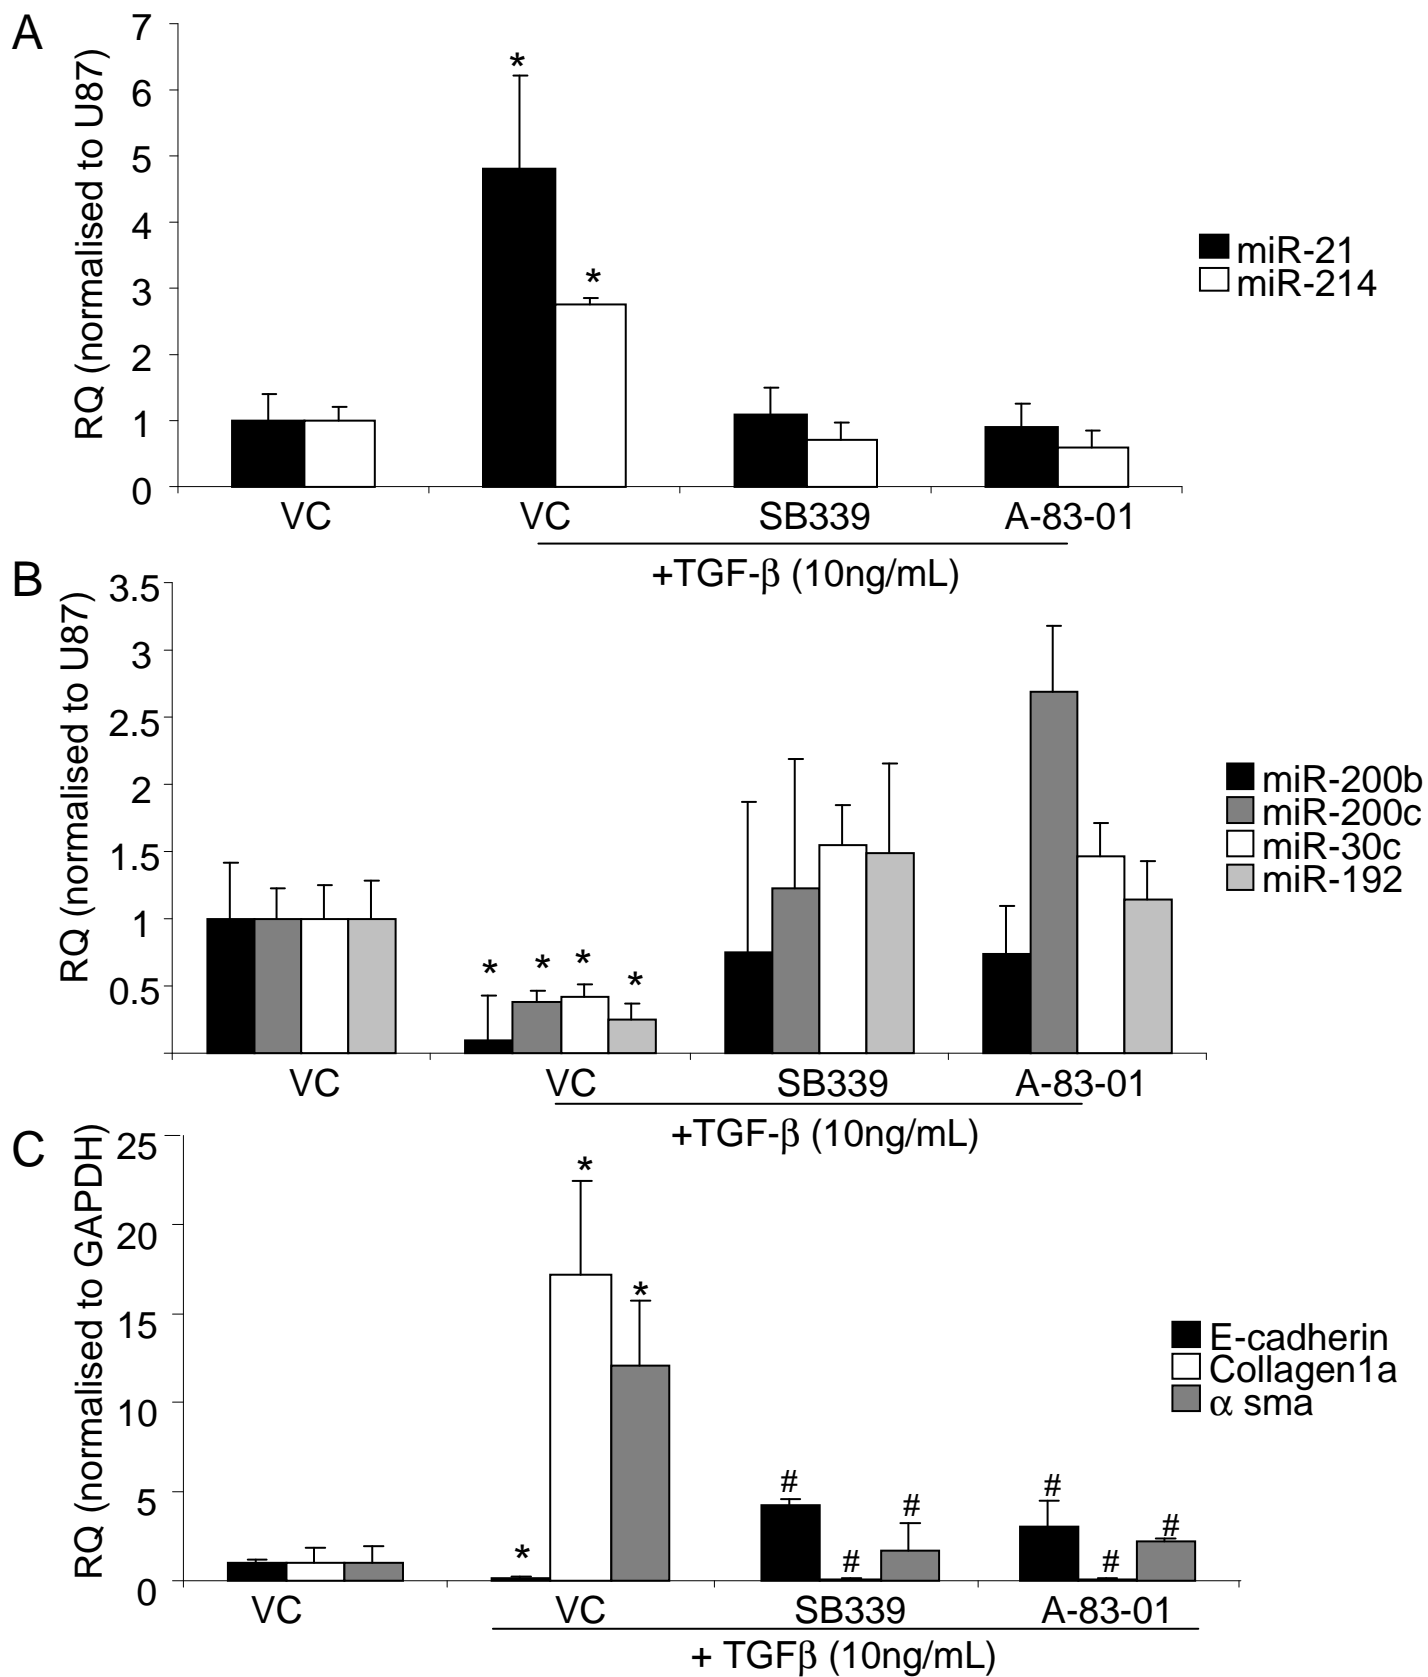

Supplement: mmc4.pdf [file mmc4.pdf]

### TGFB1

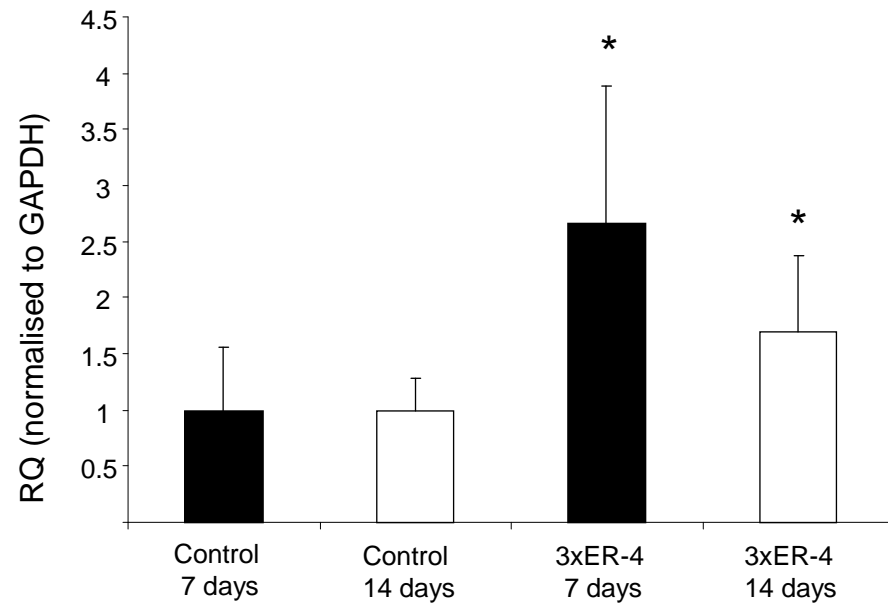

### TGFBR1

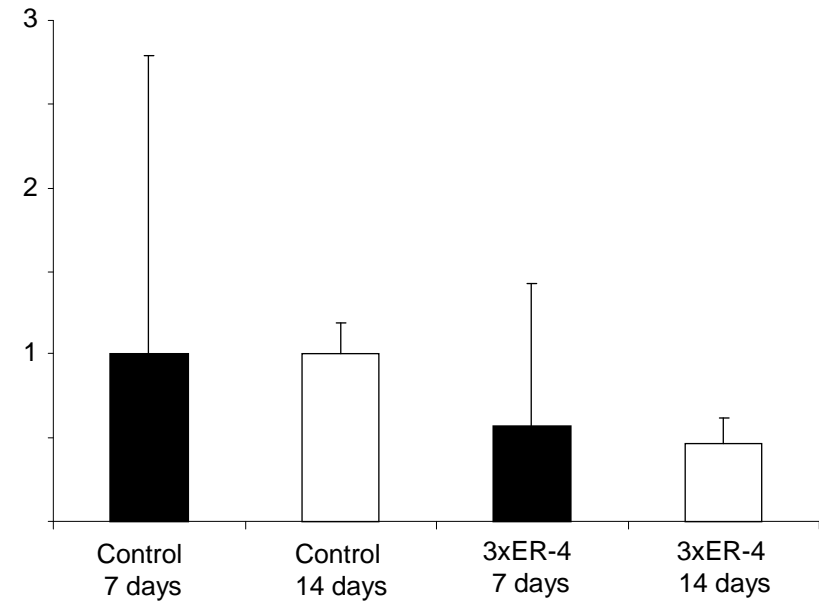

Supplement: mmc5.pdf [file mmc5.pdf]

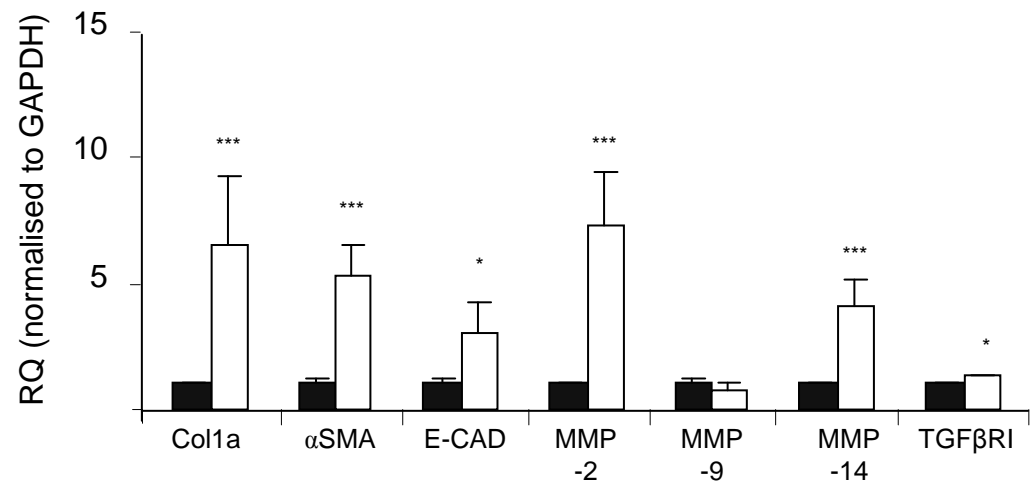

Supplement: mmc6.pdf [file mmc6.pdf]

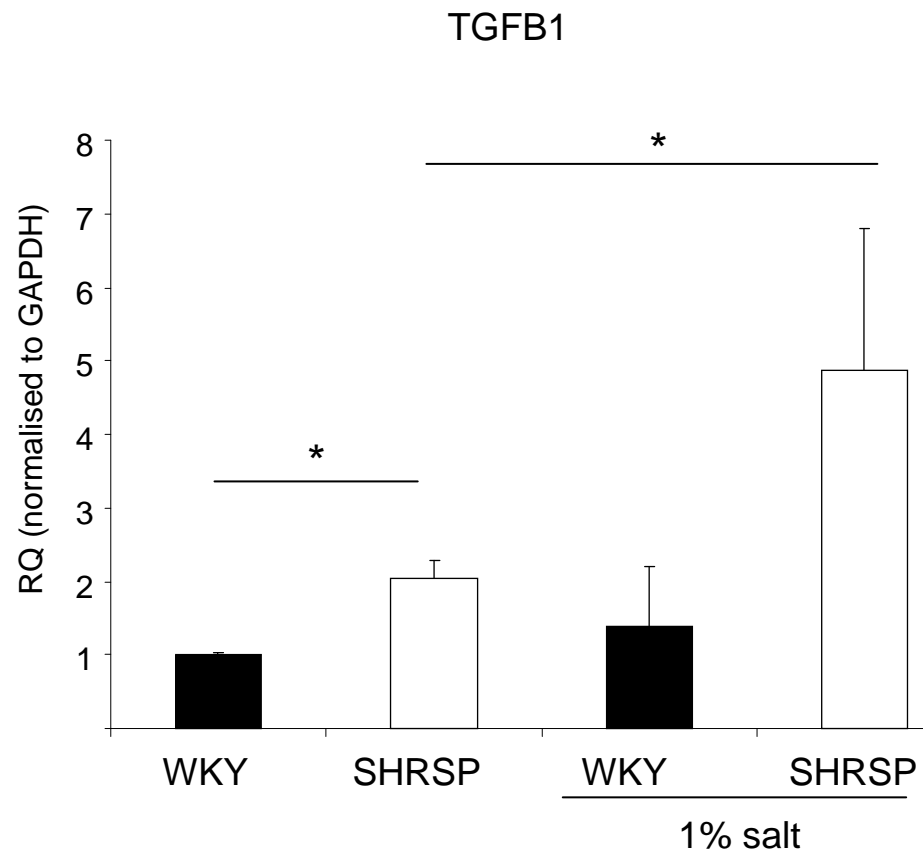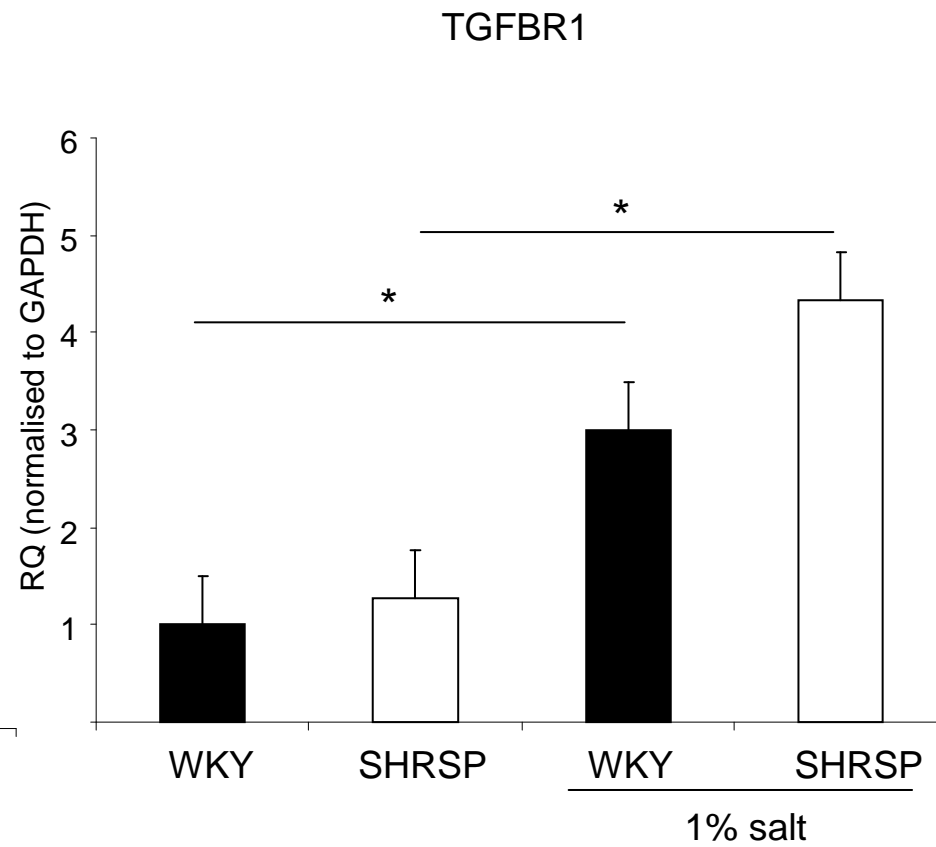

Supplement: mmc7.pdf [file mmc7.pdf]
